# Supplementary material
Source: Springer Nature journal article supplement (https://www.springermedizin.de/resource/supplementary/13063_2013_1534_MOESM6_ESM.pdf/9620226)
Supplement: MOESM6 [file 9620226]

| Patient                                                          | Intervention                                    | Control                                     | Outcomes                                            | Final Classification       |
|------------------------------------------------------------------|-------------------------------------------------|---------------------------------------------|-----------------------------------------------------|----------------------------|
| <b>tRCT</b>                                                      |                                                 |                                             |                                                     |                            |
| Children <5 years old with bacterial pneumonia                   | Amoxicillin 80 mg/kg/d PO                       | Ampicillin 100 mg/kg/d IV                   | Development of empyema or pulmonary abscess         |                            |
| <b>sRCTs</b>                                                     |                                                 |                                             |                                                     |                            |
| Children <5 years old with bacterial pneumonia (narrow criteria) | Amoxicillin PO (broad criteria)                 | Ampicillin IV (broad criteria)              | Development of empyema (narrow criteria)            | More or less identical     |
| Children <10 years old with bacterial pneumonia (broad criteria) | Amoxicillin 80 mg/kg/d BID PO (narrow criteria) | Ampicillin 200 mg/kg/d (broad criteria)     | Development of local complications (broad criteria) | Similar, but not identical |
| Children with pneumonia (broadest criteria)                      | Oral antibiotic treatment (broadest criteria)   | IV antibiotic treatment (broadest criteria) | Development of complications (broadest criteria)    | Broadly similar            |
| Children <5 years old with pneumonia (broad criteria)            | Amoxicillin 80 mg/kg TID PO (narrow criteria)   | Placebo (different)                         | Development of empyema (narrow criteria)            | Needs to be excluded       |
